# Supplementary material for: Clinical application of a cancer genomic profiling assay to guide precision medicine decisions
Source: PubMed Central journal article supplement — Per Med. 2017 May 26;14(4):309–25. doi: 10.2217/pme-2017-0011 (PMC5580078; doi:10.2217/pme-2017-0011), 2017-05-26

## Supplemental Figure Legends

**Supplemental Figure 1. Validation of sequence coverage across regions of interest.** (A) High level sequence coverage is achieved across all regions of interest (ROI). (B) The majority of sequenced bases (~80) are aligned to or adjacent to ROI. (C) The GC bias plot demonstrates that the sequenced libraries produce uniform coverage regardless of the regional GC content. %GC content of 100bp windows (x-axis). Blue circles (normalized coverage), red lines (%GC of the ROI), green line (base quality across GC percentages).

**Supplemental Figure 2. Validation of sequence coverage depth across all 435 panel genes.** 100 specimens underwent CANCERPLEX testing and the depth of coverage is shown on the y-axis of the box plot. Each of the 435 genes on the panel is shown on the x-axis. Open boxes represent mean coverage and lines show standard deviation. Outliers are depicted by black circles. Note that noncoding exons are included.

**Supplemental Figure 3. Validation of copy-number profiles generated by CANCERPLEX.** (A) Global CNV profile for cell line SNU-16 based on CANCERPLEX and visualized by CNVkit. (B) Comparison to Affymetrix SNP6.0 array visualized by IGV (SNU-16, CCLE data). (C) CNV profile for clinical case #1194. Focal *CDKN2A/CDKN2B* loss was detected (9p21.3). (D) P16 IHC staining, case #1194. Negative staining of glioblastoma tumor cells. Positive cell is residual normal neuron (internal positive control). (E) CNV profile for clinical case #1180. Focal amplification of *ERBB2 (HER2/neu)* was detected (17q12). (F) HER2/CEN17q dual-probe FISH assay for the CRC case #1180. HER2 signal (red) is amplified confirming CANCERPLEX findings.

**Supplemental Figure 1.**

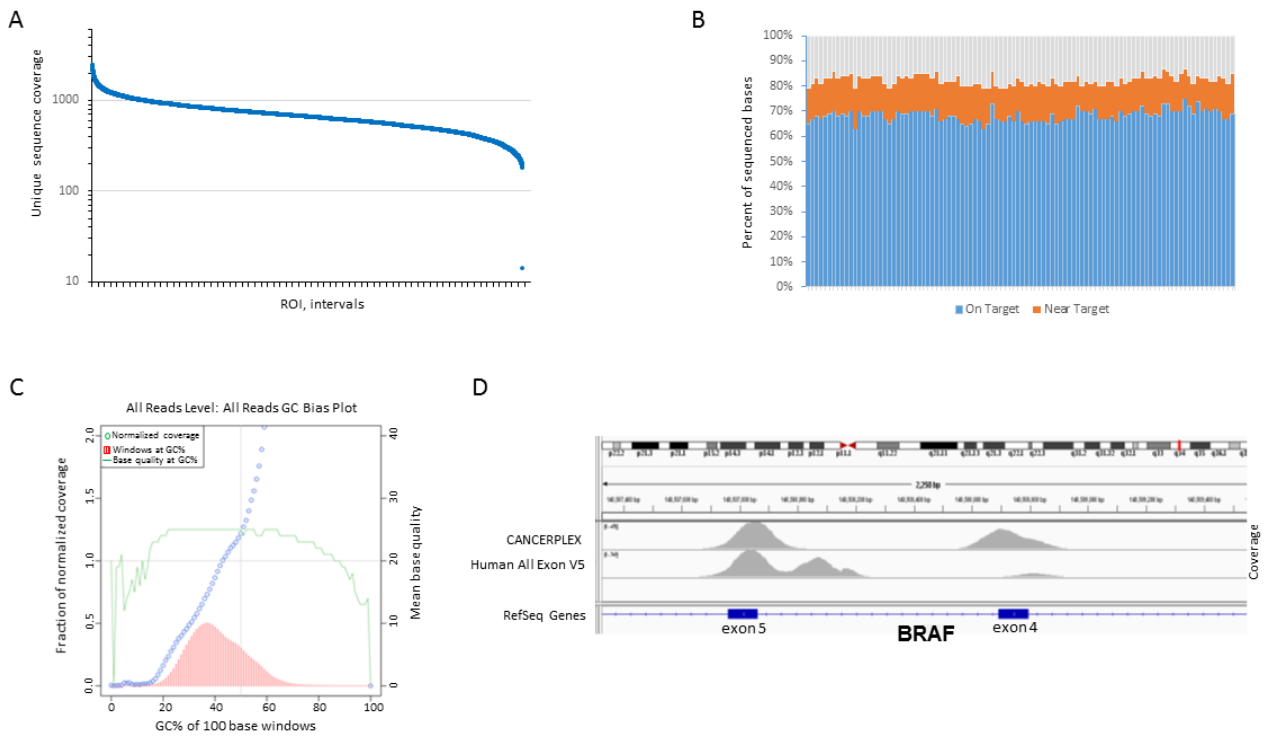

**Supplemental Figure 2.**

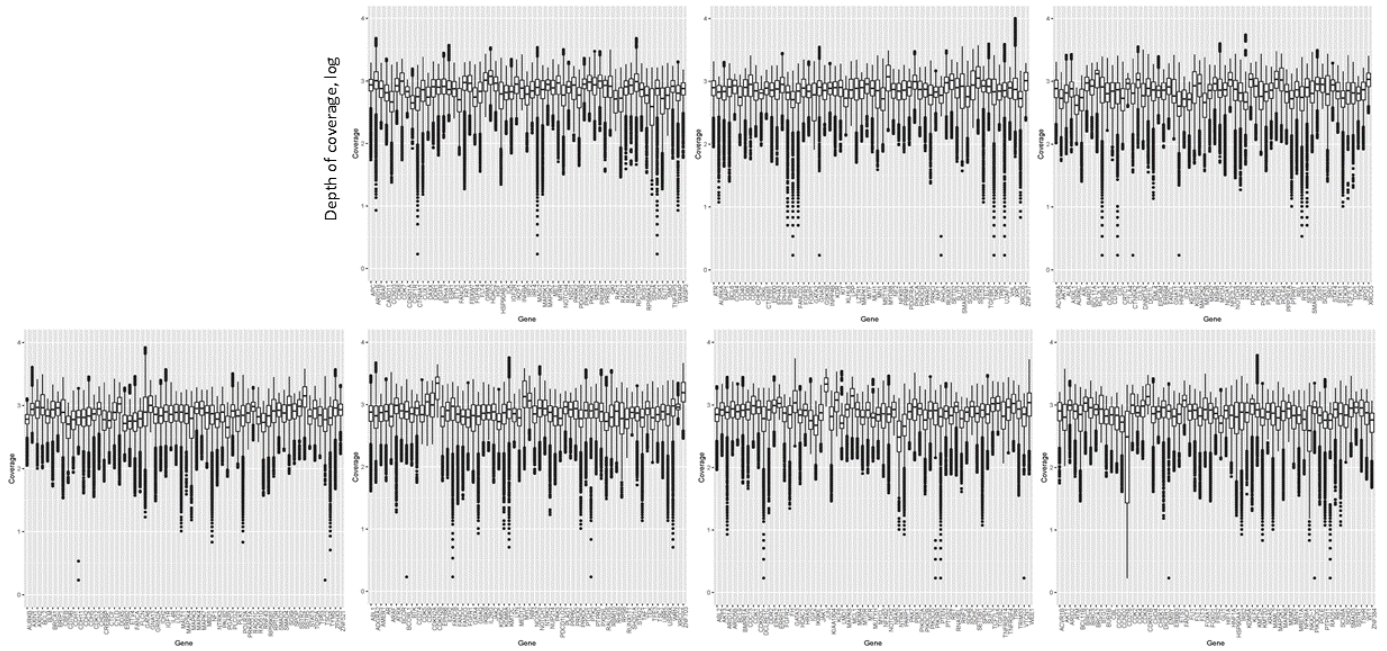

**Supplemental Figure 3.**

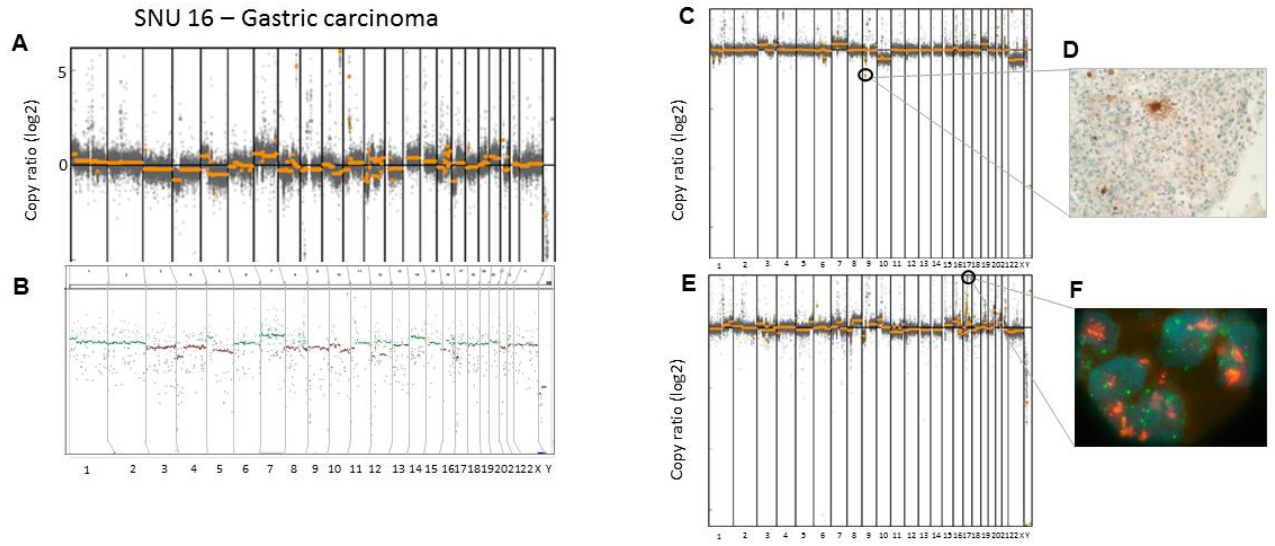

Supplement: pme-14-309-s1.pdf [file pme-14-309-s1.pdf]
