# Supplementary material for: Clinical Application of a Cancer Genomic Profiling Assay to Guide Precision Medicine Decisions
Source: Atypon-hosted journal article supplement (doi:10.2217/pme-2017-0011), 2017-05-26
Supplement: Supplementary_tables.pdf [file Supplementary_tables.pdf]

## Supplemental Table Legends

**Supplementary Table 1.** The 435 genes covered on the CANCERPLEX gene panel.

**Supplementary Table 2. SNP detection.** Pools of following reference samples from the Coriell Institute were sequenced in triplicates. Pools A-C: 20% NA19059/JPT59, 20% NA18595/CHB95, 20% NA19648/MXL48. 20% NA19701/ASW01, 20% NA19703/ASW03. Pools D-F: 20% NA18507/YRI07, 20% NA18595/CHB95, 20% NA19648/MXL48, 20% NA19701/ASW01, 20% NA19703/ASW03. The libraries were prepared in triplicates (A-C and D-F) and underwent CANCERPLEX testing. The true positive (TP), false positive (FP), and false negative rates were calculated. The sensitivity, positive predictive value (PPV) and accuracy were determined.

**Supplementary Table 3. Indel detection performance** Pools of following reference samples from Coriell Institute were sequenced in triplicates. Pools A-C: 20% NA19059/JPT59, 20% NA18595/CHB95, 20% NA19648/MXL48. 20% NA19701/ASW01, 20% NA19703/ASW03. Pools D-F: 20% NA18507/YRI07, 20% NA18595/CHB95, 20% NA19648/MXL48, 20% NA19701/ASW01, 20% NA19703/ASW03. The libraries were prepared in triplicates (A-C and D-F) and underwent CANCERPLEX testing. The true positive (TP), false positive (FP), and false negative rates were calculated. The sensitivity, positive predictive value (PPV) and accuracy were determined.

**Supplementary Table 4. Concordance with Sanger sequencing for detecting SNVs.** The concordance between Sanger sequencing and CANCERPLEX testing is excellent with a mean sensitivity of 100 and a positive predictive value (PPV) of 98.7. Six cell lines that had been previously validated using Sanger sequencing underwent CANCERPLEX testing and the true positive (TP), false positive (FP), and false negative rates were calculated. The sensitivity and positive PPV were determined.

**Supplementary Table 5. Concordance with Sanger sequencing for detecting indels.** CANCERPLEX testing accurately identified indels in all sixteen cell lines/FFPE tumor specimens that were tested. The chromosome, chromosome position, variant ID, and location, size and sequence of each gene variant is provided. The concordance between methods was determined.

**Supplementary Table 6. Identification of low-allelic fraction variants.** Reference DNA (Horizon) was used to quantify allelic fraction of known variants and compared to the expectation (ddPCR). Note that the standard deviation was found to be below 0.2.

## Supplemental Table Legends (cont.)

**Supplementary Table 8. SNV/indel limit of detection (LOD) as a function of sequencing depth.** For SNVs with an allelic fraction of 0.1, high sensitivity detection (>98%) is achieved with 200X coverage. A series of diluted samples were sequenced in consecutive windows of sequencing depth, until 500X coverage was reached.

**Supplementary Table 9. Detection of copy-number and translocation events is concordant with orthogonal methods.** Detection of select gene amplifications and the EML4-ALK translocation using CANCERPLEX was highly concordant with results obtained by FISH, IHC, PCR or non-Illumina NGS. A series of cell lines and clinical FFPE specimens with known ERBB2, MYC or FGFR2 amplifications and several cell lines harboring the EML4-ALK translocation underwent CANCERPLEX testing. The concordance between methods was determined.

**Supplementary Table 10. MSI detection using CANCERPLEX is 100% concordant with expected results.** The MSS-status of fifteen clinical FFPE samples was determined using PCR with Bethesda markers and IHC to confirm the expression of MMR proteins. CANCERPLEX testing was performed on the fifteen characterized FFPE samples and the number of indels within the ROI was calculated. The concordance between methods was determined. Tumor mutation burden correlates with MSI-status.

**Supplementary Table 11. Viral detection using CANCERPLEX is 100% concordant with expected results.** The EBV/HPV-18 status of 6 FFPE samples and 4 cell lines was determined using PCR to amplify EBV/HPV-18 specific sequences. CANCERPLEX testing was performed on the 10 characterized samples and the percentage of total number of reads mapped to the viral genomes was calculated. The concordance between methods was determined.

**Supplementary Table 12. LOD for *EML4-ALK* translocation as a function of sequencing depth** The minimum tumor content required to detect the translocation event in 100% cases was  $\geq 20\%$ , with coverage of about 300x (at least 4 split reads). For 10% tumor purity, accuracy was 93%. The H2228 cell line, which expresses the *EML4-ALK* gene fusion, was diluted to generate a series of samples with an allelic fraction ranging from 0.1 to 0.5. Each sample was sequenced up to six times and the number of chimeric reads, mean coverage and coverage of intron 19 of the ALK gene was determined.

**Supplementary Table 13. Description of cell lines, tumor FFPE and DNA samples used to evaluate the performance of CANCERPLEX to detect all the different genomic aberrations.**

## Supplemental Table Legends (cont.)

**Supplementary Table 14. Selection of CANCERPLEX targets.** The frequency of a given gene being mutated across each of 31 different cancer types.

**Supplementary Table 15. CANCERPLEX attains high sequencing uniformity and depth of coverage across regions of interest (ROI).** Ten clinical FFPE tumor specimens underwent testing and key parameters were determined, including depth of sequencing (mean coverage depth), coverage across ROI (uniformity of coverage), percentage of PCR duplicates, percentage of sequenced bases that were mapped to ROI (sequence mapped to ROI), ROI with no sequenced bases (zero coverage), target coverage at 100x and 500x.

**Supplemental Table 1.**

|        |        |        |         |        |        |          |        |        |          |         |        |         |          |        |
|--------|--------|--------|---------|--------|--------|----------|--------|--------|----------|---------|--------|---------|----------|--------|
| ABL1   | BCL11A | CD276  | CIC     | EPHA7  | FH     | HSP90AA1 | KLF5   | MDM2   | NFKBIA   | PIK3C2B | PTEN   | RPS6KA2 | SPEN     | TP53   |
| ABL2   | BCL11B | CD40   | CREBBP  | EPHB1  | FLCN   | HSP90AB1 | KLF6   | MDM4   | NKX2-1   | PIK3C2G | PTGS2  | RPS6KB1 | SPOP     | TP63   |
| ACVR1B | BCL2   | CD79A  | CRKL    | EPHB6  | FLI1   | ICK      | KLHL6  | MED12  | NOTCH1   | PIK3CA  | PTK2   | RPTOR   | SRC      | TPR    |
| ACVR2A | BCL2L1 | CD79B  | CRTC1   | ERBB2  | FLT1   | IDH1     | KMT2A  | MEF2B  | NOTCH2   | PIK3CB  | PTPN11 | RUNX1   | SSTR1    | TPX2   |
| ADGRA2 | BCL6   | CD80   | CSF1R   | ERBB3  | FLT3   | IDH2     | KMT2C  | MEN1   | NOTCH3   | PIK3CD  | PTPRD  | RUNX1T1 | SSTR2    | TRIM33 |
| AKT1   | BCL9   | CD86   | CTCF    | ERBB4  | FLT4   | IGF1R    | KMT2D  | MET    | NOTCH4   | PIK3CG  | PTPRT  | RYR1    | SSTR3    | TRRAP  |
| AKT2   | BCOR   | CDC73  | CTLA4   | ERG    | FOXA1  | IGF2     | KRAS   | MITF   | NRAS     | PIK3R1  | PXDNL  | SCN8A   | SSTR5    | TSC1   |
| AKT3   | BCORL1 | CDH1   | CTNNA1  | ERRF1  | FOXO1  | IGF2R    | LIG3   | MLH1   | NRG1     | PIK3R2  | QKI    | SDHA    | STAG2    | TSC2   |
| ALK    | BIRC2  | CDH11  | CTNNA2  | ESR1   | FOXP1  | IKBKB    | LMO1   | MN1    | NSD1     | PIK3R3  | RAC1   | SDHB    | STAT3    | TSHR   |
| AMER1  | BIRC3  | CDH2   | CTNNB1  | ETS1   | FRS2   | IKBKE    | LPP    | MRE11A | NTRK1    | PLAG1   | RAD17  | SDHC    | STAT4    | TYMS   |
| APC    | BLM    | CDH5   | CUL3    | ETV1   | GATA2  | IKZF1    | LYN    | MSH2   | NTRK2    | PLCG1   | RAD50  | SDHD    | STK11    | U2AF1  |
| AR     | BMPR1A | CDK1   | CUX1    | ETV4   | GATA3  | IL2RG    | LZTR1  | MSH6   | NTRK3    | PLCG2   | RAD51  | SETD2   | STK36    | UBR5   |
| ARAF   | BRAF   | CDK12  | CYLD    | ETV5   | GATA4  | IL4R     | MAGI2  | MST1R  | NUP214   | PLK1    | RAD51C | SETDB1  | SUFU     | USP9X  |
| ARID1A | BRCA1  | CDK2   | DAXX    | ETV6   | GATA6  | INHBA    | MAGI3  | MTOR   | PAK3     | PMS1    | RAD51D | SF3B1   | TAF1     | VHL    |
| ARID1B | BRCA2  | CDK4   | DCLRE1C | EZH2   | GLI1   | INPP4B   | MALT1  | MTR    | PALB2    | PMS2    | RAF1   | SGK1    | TCF7L1   | VTCN1  |
| ARID2  | BRD4   | CDK5   | DDR1    | FANCA  | GNA11  | IRF2     | MAML2  | MTRR   | PARK2    | POLD1   | RALGDS | SH2D1A  | TCF7L2   | WEE1   |
| ARID5B | BRIP1  | CDK6   | DDR2    | FANCB  | GNA13  | IRF4     | MAP2K1 | MUTYH  | PARP1    | POLE    | RASA1  | SLIT2   | TEK      | WISP3  |
| ASXL1  | BTG1   | CDK7   | DDX5    | FANCC  | GNAQ   | IRS2     | MAP2K2 | MYC    | PAX3     | POLE4   | RB1    | SLIT3   | TERT     | WRN    |
| ATM    | BTK    | CDK8   | DICER1  | FANCD2 | GNAS   | JAK1     | MAP2K4 | MYCL   | PAX7     | POLR2A  | RBM10  | SMAD2   | TET2     | WT1    |
| ATR    | BUB1B  | CDK9   | DNMT3A  | FANCE  | GRIN2A | JAK2     | MAP3K1 | MYCN   | PAX8     | PPARG   | REL    | SMAD3   | TFE3     | XPC    |
| ATRX   | CARD11 | CDKN1A | DOT1L   | FANCF  | GRM3   | JUN      | MAP3K7 | MYD88  | PBRM1    | PPP2R1A | RET    | SMAD4   | TGFB2    | XPO1   |
| AURKA  | CBFB   | CDKN1B | EGFR    | FANCG  | GSK3B  | KDM5A    | MAPK1  | NBN    | PBX1     | PPP6C   | RHEB   | SMARCA4 | TGFB2    | XRCC2  |
| AURKB  | CBL    | CDKN2A | EML4    | FANCL  | HDAC1  | KDM5C    | MAPK3  | NCOA1  | PDCD1    | PRDM1   | RHOA   | SMARCB1 | TMPPRSS2 | XRCC5  |
| AURKC  | CCND1  | CDKN2B | EMSY    | FAT1   | HDAC2  | KDM6A    | MAPK4  | NCOA2  | PDCD1LG2 | PREX2   | RICTOR | SMO     | TNFAIP3  | XRCC6  |
| AXIN1  | CCND2  | CDKN2C | EP300   | FBXW7  | HGF    | KDR      | MAPK6  | NF1    | PDGFRA   | PRKAR1A | RNASEL | SOS1    | TNFRSF14 | ZFH3   |
| AXIN2  | CCND3  | CHD2   | EPCAM   | FGFR1  | HIF1A  | KEAP1    | MAPK7  | NF2    | PDGFRB   | PRKCI   | RNF2   | SOX10   | TNFRSF4  | ZNF217 |
| AXL    | CCNE1  | CHD4   | EPHA2   | FGFR2  | HNF1A  | KIAA1804 | MAPK8  | NFE2L2 | PDK1     | PRKDC   | RNF43  | SOX11   | TNK2     | ZNF384 |
| BAP1   | CCR4   | CHEK1  | EPHA3   | FGFR3  | HNF4A  | KISS1R   | MBD1   | NFKB1  | PGAP3    | PRSS1   | ROS1   | SOX2    | TOP1     | ZNF521 |
| BARD1  | CD274  | CHEK2  | EPHA5   | FGFR4  | HRAS   | KIT      | MCL1   | NFKB2  | PIK3C2A  | PTCH1   | RP56   | SOX9    | TOP2A    | ZNF703 |

Supplemental Table 2.

| Pool, mean coverage | Mutation allelic fraction | True positives (TP) | False positives (FP) | False negatives (FN) | Sensitivity (%) | PPV (%)     | Accuracy (%)   |
|---------------------|---------------------------|---------------------|----------------------|----------------------|-----------------|-------------|----------------|
| A<br>341x           | 0.1                       | 122                 | 8                    | 7                    | 93.85           | 94.6        | 99.9995        |
|                     | 0.2                       | 98                  | 2                    | 7                    | 98              | 93.3        | 99.9997        |
|                     | 0.3                       | 88                  | 0                    | 7                    | 100             | 92.6        | 99.9998        |
|                     | 0.4                       | 67                  | 2                    | 7                    | 97.10           | 90.5        | 99.9997        |
|                     | 0.5                       | 60                  | 0                    | 7                    | 100             | 89.5        | 99.9998        |
|                     | 0.6                       | 49                  | 0                    | 7                    | 100             | 87.5        | 99.9998        |
|                     | 0.7                       | 38                  | 0                    | 7                    | 100             | 8.44        | 99.9998        |
|                     | 0.8                       | 68                  | 0                    | 7                    | 100             | 90.6        | 99.9998        |
| B<br>486x           | 0.1                       | 127                 | 3                    | 4                    | 97.69           | 96.9        | 99.9998        |
|                     | 0.2                       | 100                 | 0                    | 4                    | 100             | 96.1        | 99.9999        |
|                     | 0.3                       | 88                  | 0                    | 4                    | 100             | 95.6        | 99.9999        |
|                     | 0.4                       | 68                  | 1                    | 4                    | 98.55           | 94.4        | 99.9998        |
|                     | 0.5                       | 60                  | 0                    | 4                    | 100             | 93.6        | 99.9999        |
|                     | 0.6                       | 49                  | 0                    | 4                    | 100             | 92.4        | 99.9999        |
|                     | 0.7                       | 38                  | 0                    | 4                    | 100             | 90.4        | 99.9999        |
|                     | 0.8                       | 68                  | 0                    | 4                    | 100             | 94.4        | 99.9999        |
| C<br>492x           | 0.1                       | 126                 | 4                    | 6                    | 96.92           | 95.4        | 99.9996        |
|                     | 0.2                       | 100                 | 0                    | 6                    | 100             | 94.3        | 99.9998        |
|                     | 0.3                       | 88                  | 0                    | 6                    | 100             | 93.6        | 99.9998        |
|                     | 0.4                       | 68                  | 1                    | 6                    | 98.55           | 91.9        | 99.9998        |
|                     | 0.5                       | 60                  | 0                    | 6                    | 100             | 90.9        | 99.9998        |
|                     | 0.6                       | 49                  | 0                    | 6                    | 100             | 89          | 99.9998        |
|                     | 0.7                       | 38                  | 0                    | 6                    | 100             | 86.3        | 99.9998        |
|                     | 0.8                       | 68                  | 0                    | 6                    | 100             | 91.9        | 99.9998        |
| D<br>599x           | 0.1                       | 101                 | 0                    | 1                    | 100             | 99          | 99.9999        |
|                     | 0.2                       | 61                  | 0                    | 1                    | 100             | 98.3        | 99.9999        |
|                     | 0.3                       | 63                  | 0                    | 1                    | 100             | 98.4        | 99.9999        |
|                     | 0.4                       | 44                  | 0                    | 1                    | 100             | 97.8        | 99.9999        |
|                     | 0.5                       | 26                  | 0                    | 1                    | 100             | 96.3        | 99.9999        |
|                     | 0.6                       | 33                  | 0                    | 1                    | 100             | 97          | 99.9999        |
|                     | 0.7                       | 29                  | 0                    | 1                    | 100             | 96.7        | 99.9999        |
|                     | 0.8                       | 43                  | 0                    | 1                    | 100             | 97.7        | 99.9999        |
| E<br>539x           | 0.1                       | 88                  | 1                    | 1                    | 98.88           | 98.9        | 99.9999        |
|                     | 0.2                       | 58                  | 0                    | 1                    | 100             | 98.3        | 99.9999        |
|                     | 0.3                       | 53                  | 0                    | 1                    | 100             | 98.1        | 99.9999        |
|                     | 0.4                       | 40                  | 0                    | 1                    | 100             | 97.6        | 99.9999        |
|                     | 0.5                       | 26                  | 0                    | 1                    | 100             | 96.3        | 99.9999        |
|                     | 0.6                       | 31                  | 0                    | 1                    | 100             | 96.9        | 99.9999        |
|                     | 0.7                       | 25                  | 0                    | 1                    | 100             | 96.1        | 99.9999        |
|                     | 0.8                       | 36                  | 0                    | 1                    | 100             | 97.3        | 99.9999        |
| F<br>543x           | 0.1                       | 124                 | 4                    | 4                    | 96.88           | 96.9        | 99.9997        |
|                     | 0.2                       | 81                  | 1                    | 4                    | 98.78           | 95.3        | 99.9998        |
|                     | 0.3                       | 77                  | 1                    | 4                    | 98.72           | 95          | 99.9998        |
|                     | 0.4                       | 65                  | 0                    | 4                    | 100             | 94.2        | 99.9999        |
|                     | 0.5                       | 34                  | 0                    | 4                    | 100             | 89.5        | 99.9999        |
|                     | 0.6                       | 43                  | 0                    | 4                    | 100             | 91.5        | 99.9999        |
|                     | 0.7                       | 36                  | 0                    | 4                    | 100             | 90          | 99.9999        |
|                     | 0.8                       | 57                  | 0                    | 4                    | 100             | 93.4        | 99.9999        |
|                     |                           |                     |                      | <b>Mean</b>          | <b>99.46</b>    | <b>94.1</b> | <b>99.9998</b> |
|                     |                           |                     |                      | <b>SD</b>            | 1.21            | 3.5         | 0.00011        |

**Supplemental Table 3.**

| Pool, mean coverage | Mutation allelic fraction | True positives (TP) | False positives (FP) | False negatives (FN) | Sensitivity (%) | PPV (%) | Accuracy (%) |
|---------------------|---------------------------|---------------------|----------------------|----------------------|-----------------|---------|--------------|
| <b>A</b>            | 0.1                       | 11                  | 0                    | 0                    | 100             | 100     | 100          |
| <b>341x</b>         | 0.2                       | 11                  | 0                    | 0                    | 100             | 100     | 100          |
| <b>B</b>            | 0.1                       | 11                  | 0                    | 0                    | 100             | 100     | 100          |
| <b>486x</b>         | 0.2                       | 11                  | 0                    | 0                    | 100             | 100     | 100          |
| <b>C</b>            | 0.1                       | 11                  | 0                    | 0                    | 100             | 100     | 100          |
| <b>492x</b>         | 0.2                       | 11                  | 0                    | 0                    | 100             | 100     | 100          |
| <b>D</b>            | 0.1                       | 5                   | 0                    | 0                    | 100             | 100     | 100          |
| <b>599x</b>         | 0.2                       | 5                   | 0                    | 0                    | 100             | 100     | 100          |
| <b>E</b>            | 0.1                       | 5                   | 0                    | 0                    | 100             | 100     | 100          |
| <b>539x</b>         | 0.2                       | 5                   | 0                    | 0                    | 100             | 100     | 100          |
| <b>F</b>            | 0.1                       | 5                   | 0                    | 0                    | 100             | 100     | 100          |
| <b>543x</b>         | 0.2                       | 5                   | 0                    | 0                    | 100             | 100     | 100          |
|                     |                           |                     |                      | <b>Mean</b>          | 100             | 100     | 100          |

**Supplemental Table 4.**

| Sample          | True positives (TP) | False positives (FP) | False negatives (FN) | Sensitivity (%) | PPV (%) |
|-----------------|---------------------|----------------------|----------------------|-----------------|---------|
| HCC1143/HCC1143 | 4                   | 0                    | 0                    | 100             | 100     |
| HCC1954/PC      | 12                  | 1                    | 0                    | 100             | 92.3    |
| 1EU2MALD/1EU    | 5                   | 0                    | 0                    | 100             | 100     |
| 9N8G9AU1/9N8G   | 4                   | 0                    | 0                    | 100             | 100     |
| LZZ5UACW/LZZ    | 7                   | 0                    | 0                    | 100             | 100     |
| LQHWAEAF9/LQH   | 5                   | 0                    | 0                    | 100             | 100     |
| <b>Mean</b>     |                     |                      |                      | 100             | 98.7    |

**Supplemental Table 5.**

| Sample             | Chromosome | Position  | Variant ID            | Variant                                                         | Correctly detected by<br>CANCERPLEX |
|--------------------|------------|-----------|-----------------------|-----------------------------------------------------------------|-------------------------------------|
| P.T.610/610        | 17         | 37880997  | rs397516979           | ERBB2 c.2236_2237insTGT                                         | yes                                 |
| P.T.613/613        | 7          | 55242465  | rs727504233           | EGFR c.2236_2250delGAATTAAGAGAAGCA                              | yes                                 |
| Clinical sample 28 | 7          | 55242464  | rs121913421           | EGFR c.2235_2249delGGAATTAAGAGAAGC                              | yes                                 |
| Clinical sample 29 | 7          | 55242464  | rs121913421           | EGFR c.2235_2249delGGAATTAAGAGAAGC                              | yes                                 |
| Clinical sample 30 | 7          | 55242465  | rs727504233           | EGFR c.2236_2250delGAATTAAGAGAAGCA                              | yes                                 |
| Clinical sample 31 | 7          | 55242465  | rs727504233           | EGFR c.2236_2250delGAATTAAGAGAAGCA                              | yes                                 |
| Clinical sample 32 | 7          | 55242466  | rs121913425           | EGFRc.2237_2251delAATTAAGAGAAGCAA                               | yes                                 |
| Clinical sample 33 | 7          | 55242465  | rs121913436           | EGFRc.2236_2244delGAATTAAGA                                     | yes                                 |
| Clinical sample 34 | 7          | 55242464  | rs121913421           | EGFR c.2235_2249delGGAATTAAGAGAAGC                              | yes                                 |
| Clinical sample 35 | 17         | 37880995  | N/A                   | ERBB2 c.2324_2325insATACGTGATGGA                                | yes                                 |
| Clinical sample 36 | 11         | 108205734 | N/A                   | ATM c.8050dupC                                                  | yes                                 |
| Clinical sample 37 | 7          | 55242469  | rs121913438           | EGFR c.2240_2257delTAAGAGAAGCAACATCTC                           | yes                                 |
| Clinical sample 38 | 12         | 25398283  | N/A                   | KRAS c.30_35dupAGCTGG                                           | yes                                 |
| Clinical sample 6  | 7          | 55249002  | rs727503012           | EGFR c.2300_2301insCAGCGTGGA                                    | yes                                 |
| GM14094            | 17         | 41246333  | rs80359874            | BRCA1<br>c.1175_1214delTGTTAGGTTCTGATGACTCACATGATGGGGAGTCTGAATC | yes                                 |
| GM14096            | 17         | 41244056  | rs80357877;rs80357910 | BRCA1 c.3481_3491delGAAGATACTAG                                 | yes                                 |



**Supplemental Table 6.**

| Reference variant    | Coverage | Number of reads with variant | Reference AF | Predicted AF | SD    |
|----------------------|----------|------------------------------|--------------|--------------|-------|
| EGFR L858R           | 2728x    | 135                          | 5.0%         | 4.95%        | 0.04% |
| EGFR del E746-A750   | 1774x    | 60                           | 5.0%         | 3.38%        | 1.14% |
| EGFR T790M           | 1884x    | 89                           | 5.0%         | 4.72%        | 0.20% |
| EGFR V769-D770insASV | 589x     | 21                           | 5.0%         | 3.40%        | 1.13% |
| KRAS G12D            | 1439x    | 60                           | 6.3%         | 4.17%        | 1.51% |
| NRAS Q61K            | 1682x    | 99                           | 6.3%         | 5.89%        | 0.29% |
| NRAS A59T            | 1719x    | 112                          | 6.3%         | 6.52%        | 0.15% |
| PIK3CA E545K         | 2074x    | 131                          | 6.3%         | 6.32%        | 0.01% |

**Supplemental Table 7.**

| <b>Replicate 1</b> | <b>Replicate 2</b> | <b>Variants in run 1 (unique)</b> | <b>Variants in run 2 (unique)</b> | <b>Variants in both runs</b> | <b>Concordance (%)</b> |
|--------------------|--------------------|-----------------------------------|-----------------------------------|------------------------------|------------------------|
| Sample 1 - Run 1   | Sample 1 - Run 2   | 24                                | 14                                | 265                          | 93.3                   |
| Sample 1 - Run 3   | Sample 1 - Run 4   | 22                                | 20                                | 267                          | 97.7                   |
| Sample 1 - Run 5   | Sample 1 - Run 6   | 16                                | 24                                | 263                          | 92.9                   |
|                    |                    |                                   |                                   | <b>Mean</b>                  | 93                     |

  

| <b>Replicate 1</b> | <b>Replicate 2</b> | <b>Variants in run 1 (unique)</b> | <b>Variants in run 2 (unique)</b> | <b>Variants in both runs</b> | <b>Concordance (%)</b> |
|--------------------|--------------------|-----------------------------------|-----------------------------------|------------------------------|------------------------|
| Sample 2 - Run 1   | Sample 2 - Run 2   | 15                                | 10                                | 282                          | 95.8                   |
| Sample 2 - Run 3   | Sample 2 - Run 4   | 28                                | 12                                | 280                          | 93.3                   |
| Sample 2 - Run 5   | Sample 2 - Run 6   | 24                                | 13                                | 284                          | 93.9                   |
|                    |                    |                                   |                                   | <b>Mean</b>                  | 93.63                  |

  

| <b>Replicate 1</b> | <b>Replicate 2</b> | <b>Variants in run 1 (unique)</b> | <b>Variants in run 2 (unique)</b> | <b>Variants in both runs</b> | <b>Concordance (%)</b> |
|--------------------|--------------------|-----------------------------------|-----------------------------------|------------------------------|------------------------|
| Sample 3 - Run 1   | Sample 3 - Run 2   | 19                                | 22                                | 281                          | 93.2                   |
| Sample 3 - Run 3   | Sample 3 - Run 4   | 15                                | 21                                | 285                          | 94.1                   |
| Sample 3 - Run 5   | Sample 3 - Run 6   | 18                                | 21                                | 285                          | 93.6                   |
|                    |                    |                                   |                                   | <b>Mean</b>                  | 93.63                  |

  

| <b>Day 1</b>     | <b>Day 2</b>     | <b>Variants in run 1 (unique)</b> | <b>Variants in run 2 (unique)</b> | <b>Variants in both runs</b> | <b>Concordance (%)</b> |
|------------------|------------------|-----------------------------------|-----------------------------------|------------------------------|------------------------|
| Sample 1 - Run 1 | Sample 1 - Run 2 | 21                                | 23                                | 268                          | 92.4                   |
| Sample 2 - Run 1 | Sample 2 - Run 2 | 11                                | 21                                | 286                          | 94.7                   |
| Sample 3 - Run 1 | Sample 3 - Run 2 | 16                                | 23                                | 277                          | 93.4                   |
|                  |                  |                                   |                                   | <b>Mean</b>                  | 93.5                   |

  

| <b>Operator 1</b> | <b>Operator 2</b> | <b>Variants in run 1 (unique)</b> | <b>Variants in run 2 (unique)</b> | <b>Variants in both runs</b> | <b>Concordance (%)</b> |
|-------------------|-------------------|-----------------------------------|-----------------------------------|------------------------------|------------------------|
| Sample 1 - Run 1  | Sample 1 - Run 2  | 20                                | 25                                | 269                          | 92.3                   |
| Sample 2 - Run 1  | Sample 2 - Run 2  | 15                                | 17                                | 280                          | 94.6                   |
| Sample 3 - Run 1  | Sample 3 - Run 2  | 20                                | 22                                | 278                          | 93                     |
|                   |                   |                                   |                                   | <b>Mean</b>                  | 93.3                   |

**Supplemental Table 8.**

| Mutation allelic fraction | X≤50 | 50<X≤100 | 100<X≤150 | 150<X≤200 | 200<X≤300 | 300<X≤500 |
|---------------------------|------|----------|-----------|-----------|-----------|-----------|
| 0.1                       | 5    | 22.1     | 40.9      | 51.4      | 98.5      | 100       |
| 0.2                       | 7.5  | 41.4     | 88.1      | 98.3      | 100       | 100       |
| 0.3                       | 6.7  | 81.5     | 96.9      | 100       | 100       | 100       |
| 0.4                       | 6    | 86.7     | 100       | 100       | 100       | 100       |
| 0.5                       | 50   | 100      | 100       | 100       | 100       | 100       |
| 0.6                       | 50   | 100      | 100       | 100       | 100       | 100       |
| 0.7                       | 100  | 100      | 100       | 100       | 100       | 100       |
| 0.8                       | 100  | 100      | 100       | 100       | 100       | 100       |
| 0.9                       | 100  | 100      | 100       | 100       | 100       | 100       |
| 1                         | 100  | 100      | 100       | 100       | 100       | 100       |

**Supplemental Table 9.**

| Sample                 | Expected aberration | Validation by | Detected by<br>CANCERPLEX |
|------------------------|---------------------|---------------|---------------------------|
| 5360T/536              | ERBB2 gain          | FISH/IHC      | yes                       |
| 5943T/5943T            | ERBB2 gain          | FISH/IHC      | yes                       |
| 7259TY/7259TY          | ERBB2 gain          | FISH/IHC      | yes                       |
| S12-39759/397          | ERBB2 gain          | FISH/IHC      | yes                       |
| S0357971K/1K.E1        | ERBB2 gain          | FISH          | no                        |
| HCC1954                | ERBB2 gain          | qPCR          | yes                       |
| NCI-N87                | ERBB2 gain          | FISH          | yes                       |
| SNU-16                 | FGFR2 gain          | qPCR          | yes                       |
| Clinical FFPE sample 1 | ERBB2 gain          | FISH/IHC      | yes                       |
| Clinical FFPE sample 2 | ERBB2 gain          | FISH          | yes                       |
| Clinical FFPE sample 3 | ERBB2 gain          | FISH          | yes                       |
| Clinical FFPE sample 4 | MYC gain            | FISH/IHC      | yes                       |
| Clinical FFPE sample 5 | MYC gain            | FISH          | yes                       |
| NCI-H2228              | CDKN2A/B loss       | qPCR          | yes                       |
| Hela                   | STK11 loss          | qPCR          | yes                       |
| NCI-N87                | SMAD4 loss          | qPCR          | yes                       |
| S10-57398/510          | ALK-EML4            | FISH          | yes                       |
| 2898T/289              | ALK-EML4            | FISH          | yes                       |
| NCI-H2228              | ALK-EML4            | FISH          | yes                       |
| Clinical sample 39     | EZR-ROS1            | NGS           | yes                       |
| Clinical sample 40     | RET-ERC1            | NGS           | yes                       |
| Clinical sample 41     | ALK-EML4            | FISH          | yes                       |
| Clinical sample 42     | ALK-EML4            | FISH          | yes                       |

**Supplemental Table 10.**

| Sample                  | MSI status Detected by CANCERPLEX (number of indels) | Validation by IHC | Validation by PCR | Mutation burden |
|-------------------------|------------------------------------------------------|-------------------|-------------------|-----------------|
| Clinical FFPE sample 7  | MSI-H (90)                                           | MSI-H             | MSI-H             | 40              |
| Clinical FFPE sample 8  | MSI-H (213)                                          | MSI-H             | MSI-H             | 37              |
| Clinical FFPE sample 9  | MSI-H (135)                                          | MSI-H             | MSI-H             | 36              |
| Clinical FFPE sample 10 | MSI-H (139)                                          | MSI-H             | MSI-H             | 30              |
| Clinical FFPE sample 11 | MSI-H (65)                                           | MSI-H             | MSI-H             | 26              |
| Clinical FFPE sample 12 | MSI-H (142)                                          | MSI-H             | MSS               | 35              |
| Clinical FFPE sample 13 | MSS (4)                                              | MSS               | MSS               | 18              |
| Clinical FFPE sample 14 | MSS (5)                                              | MSS               | MSS               | 17              |
| Clinical FFPE sample 15 | MSS (9)                                              | MSS               | MSS               | 17              |
| Clinical FFPE sample 16 | MSS (1)                                              | MSS               | MSS               | 17              |
| Clinical FFPE sample 17 | MSS (0)                                              | MSS               | MSS               | 15              |
| Clinical FFPE sample 18 | MSS (2)                                              | MSS               | MSS               | 15              |
| Clinical FFPE sample 19 | MSS (1)                                              | MSS               | MSS               | 15              |
| Clinical FFPE sample 20 | MSS (0)                                              | MSS               | MSI-H             | 15              |
| Clinical FFPE sample 21 | MSS (12)                                             | MSS               | MSS               | 15              |

**Supplemental Table 11.**

| Sample                  | Cancer type                  | Expected virus         | Detected by CANCERPLEX | Detected by PCR |
|-------------------------|------------------------------|------------------------|------------------------|-----------------|
| Clinical FFPE sample 22 | Gastroesophageal cancer      | EBV                    | yes                    | yes             |
| Clinical FFPE sample 23 | Gastroesophageal cancer      | EBV                    | yes                    | yes             |
| Clinical FFPE sample 24 | Gastroesophageal cancer      | EBV                    | yes                    | yes             |
| Clinical FFPE sample 25 | Gastroesophageal cancer      | EBV                    | yes                    | yes             |
| NA14094                 | cell line                    | EBV                    | yes                    | yes             |
| GM14096                 | cell line                    | EBV                    | yes                    | yes             |
| HeLa                    | cell line                    | HPV 18                 | yes                    | N/A             |
| Clinical FFPE sample 26 | Colorectal cancer            | none, negative control | no                     | no              |
| Clinical FFPE sample 27 | Breast cancer, ER/PR-, Her2- | none, negative control | no                     | no              |
| SNU-16                  | cell line                    | none, negative control | no                     | no              |

**Supplemental Table 12.**

| Sequencing experiment | H2228 dilution, % | Mean coverage depth | <i>ALKintron 19</i> coverage depth | Detected unique ALK-EML4 split reads | Reported by CANCERPLEX |
|-----------------------|-------------------|---------------------|------------------------------------|--------------------------------------|------------------------|
| 1                     | 10                | 168                 | 239                                | 1                                    | no                     |
| 2                     | 10                | 211                 | 288                                | 4                                    | yes                    |
| 3                     | 10                | 289                 | 377                                | 5                                    | yes                    |
| 4                     | 10                | 589                 | 702                                | 5                                    | yes                    |
| 5                     | 10                | 648                 | 819                                | 6                                    | yes                    |
| 6                     | 10                | 693                 | 866                                | 7                                    | yes                    |
| 7                     | 20                | 221                 | 295                                | 4                                    | yes                    |
| 8                     | 20                | 361                 | 446                                | 11                                   | yes                    |
| 9                     | 20                | 385                 | 472                                | 5                                    | yes                    |
| 10                    | 20                | 550                 | 672                                | 12                                   | yes                    |
| 11                    | 20                | 743                 | 884                                | 16                                   | yes                    |
| 12                    | 20                | 757                 | 890                                | 22                                   | yes                    |
| 13                    | 30                | 279                 | 351                                | 10                                   | yes                    |
| 14                    | 30                | 301                 | 366                                | 10                                   | yes                    |
| 15                    | 30                | 583                 | 685                                | 16                                   | yes                    |
| 16                    | 30                | 650                 | 758                                | 15                                   | yes                    |
| 17                    | 30                | 694                 | 805                                | 25                                   | yes                    |
| 18                    | 50                | 592                 | 658                                | 23                                   | yes                    |
| 19                    | 50                | 597                 | 667                                | 23                                   | yes                    |
| 20                    | 50                | 743                 | 808                                | 33                                   | yes                    |
| 21                    | 100               | 748                 | 698                                | 51                                   | yes                    |

## Supplemental Table 13.

| Validation sample  | Sample type                        | Genetic aberration                                                                            | Source                                                                   |
|--------------------|------------------------------------|-----------------------------------------------------------------------------------------------|--------------------------------------------------------------------------|
| HCC1143/HCC1143    | cell line                          | SNPs, INDELS                                                                                  | ATCC                                                                     |
| HCC1954/PC         | cell line                          | ERBB2 gain                                                                                    | ATCC                                                                     |
| NCI-N87            | cell line                          | ERBB2 gain                                                                                    | ATCC                                                                     |
| H2228/H2228        | cell line                          | ALK rearrangement                                                                             | ATCC                                                                     |
| SNU-16             | cell line                          | FGFR2 gain                                                                                    | ATCC                                                                     |
| HeLa               | cell line                          | HPV-18                                                                                        | ATCC                                                                     |
| NA14094            | DNA from EBV-transformed cell line | EBV, BRCA1 indel                                                                              | Coriell Institute for Medical Research                                   |
| GM14096            | DNA from EBV-transformed cell line | EBV, BRCA1 indel                                                                              | Coriell Institute for Medical Research                                   |
| NA19059/JPT59      | DNA from EBV-transformed cell line | SNPs, INDELS                                                                                  | Coriell Institute for Medical Research                                   |
| NA18595/CH895      | DNA from EBV-transformed cell line | SNPs, INDELS                                                                                  | Coriell Institute for Medical Research                                   |
| NA19648/MXL48      | DNA from EBV-transformed cell line | SNPs, INDELS                                                                                  | Coriell Institute for Medical Research                                   |
| NA19701/ASW01      | DNA from EBV-transformed cell line | SNPs, INDELS                                                                                  | Coriell Institute for Medical Research                                   |
| NA19703/ASW03      | DNA from EBV-transformed cell line | SNPs, INDELS                                                                                  | Coriell Institute for Medical Research                                   |
| S10-57398/510      | FFPE Tumor Patient Sample          | ALK rearrangement                                                                             | University Of Massachusetts Cancer Center Tissue and Tumor Bank          |
| 2898T/289          | FFPE Tumor Patient Sample          | ALK rearrangement                                                                             | University Of Massachusetts Cancer Center Tissue and Tumor Bank          |
| 5360T/536          | FFPE Tumor Patient Sample          | ERBB2 gain                                                                                    | University Of Massachusetts Cancer Center Tissue and Tumor Bank          |
| 5943T/5943T        | FFPE Tumor Patient Sample          | ERBB2 gain                                                                                    | University Of Massachusetts Cancer Center Tissue and Tumor Bank          |
| 7259TY/7259TY      | FFPE Tumor Patient Sample          | ERBB2 gain                                                                                    | University Of Massachusetts Cancer Center Tissue and Tumor Bank          |
| P.T.610/610        | FFPE Tumor Patient Sample          | ERBB2 exon 20 indel [insertion, ch17:37880997-37880997, Mut:TGT] [NM_004448]                  | Ref:-<br>University Of Massachusetts Cancer Center Tissue and Tumor Bank |
| P.T.613/613        | FFPE Tumor Patient Sample          | EGFR exon 19 indel [deletion, chr7:55242466-55242480, Ref:GAATTAAGAGAAGCA, Mut:-] [NM_005228] | University Of Massachusetts Cancer Center Tissue and Tumor Bank          |
| S0357971K/1K.E1    | FFPE Tumor Patient Sample          | ERBB2 gain                                                                                    | University Of Massachusetts Cancer Center Tissue and Tumor Bank          |
| S12-39759/397      | FFPE Tumor Patient Sample          | ERBB2 gain                                                                                    | University Of Massachusetts Cancer Center Tissue and Tumor Bank          |
| LZZ5UACW/LZZ       | FFPE Tumor Patient Sample          | SNPs, INDELS                                                                                  | BioServe                                                                 |
| 1EU2MALD/1EU       | FFPE Tumor Patient Sample          | SNPs, INDELS                                                                                  | BioServe                                                                 |
| 9N8G9AU1/9N8G      | FFPE Tumor Patient Sample          | SNPs, INDELS                                                                                  | BioServe                                                                 |
| LQHWEAF9/LQH       | FFPE Tumor Patient Sample          | SNPs, INDELS                                                                                  | BioServe                                                                 |
| HD780              | DNA Reference Standard             | SNPs, INDELS                                                                                  | Horizon Discovery                                                        |
| Clinical sample 1  | FFPE Tumor Patient Sample          | ERBB2 gain                                                                                    | internal                                                                 |
| Clinical sample 2  | FFPE Tumor Patient Sample          | ERBB2 gain                                                                                    | internal                                                                 |
| Clinical sample 3  | FFPE Tumor Patient Sample          | ERBB2 gain                                                                                    | internal                                                                 |
| Clinical sample 4  | FFPE Tumor Patient Sample          | MYC gain                                                                                      | internal                                                                 |
| Clinical sample 5  | FFPE Tumor Patient Sample          | MYC gain                                                                                      | internal                                                                 |
| Clinical sample 6  | FFPE Tumor Patient Sample          | EGFR indel                                                                                    | internal                                                                 |
| Clinical sample 7  | FFPE Tumor Patient Sample          | MSI-H, negative control for viral detection                                                   | internal                                                                 |
| Clinical sample 8  | FFPE Tumor Patient Sample          | MSI-H                                                                                         | internal                                                                 |
| Clinical sample 9  | FFPE Tumor Patient Sample          | MSI-H                                                                                         | internal                                                                 |
| Clinical sample 10 | FFPE Tumor Patient Sample          | MSI-H                                                                                         | internal                                                                 |
| Clinical sample 11 | FFPE Tumor Patient Sample          | MSI-H                                                                                         | internal                                                                 |
| Clinical sample 12 | FFPE Tumor Patient Sample          | MSS                                                                                           | internal                                                                 |
| Clinical sample 13 | FFPE Tumor Patient Sample          | MSS                                                                                           | internal                                                                 |
| Clinical sample 14 | FFPE Tumor Patient Sample          | MSS                                                                                           | internal                                                                 |
| Clinical sample 15 | FFPE Tumor Patient Sample          | MSS                                                                                           | internal                                                                 |
| Clinical sample 16 | FFPE Tumor Patient Sample          | MSS                                                                                           | internal                                                                 |
| Clinical sample 17 | FFPE Tumor Patient Sample          | MSS                                                                                           | internal                                                                 |
| Clinical sample 18 | FFPE Tumor Patient Sample          | MSS                                                                                           | internal                                                                 |
| Clinical sample 19 | FFPE Tumor Patient Sample          | MSS                                                                                           | internal                                                                 |
| Clinical sample 20 | FFPE Tumor Patient Sample          | MSS                                                                                           | internal                                                                 |
| Clinical sample 21 | FFPE Tumor Patient Sample          | MSS                                                                                           | internal                                                                 |
| Clinical sample 22 | FFPE Tumor Patient Sample          | EBV                                                                                           | internal                                                                 |
| Clinical sample 23 | FFPE Tumor Patient Sample          | EBV                                                                                           | internal                                                                 |
| Clinical sample 24 | FFPE Tumor Patient Sample          | EBV                                                                                           | internal                                                                 |
| Clinical sample 25 | FFPE Tumor Patient Sample          | EBV                                                                                           | internal                                                                 |
| Clinical sample 26 | FFPE Tumor Patient Sample          | negative control for viral detection                                                          | internal                                                                 |
| Clinical sample 27 | FFPE Tumor Patient Sample          | negative control for viral detection                                                          | internal                                                                 |
| Clinical sample 28 | FFPE Tumor Patient Sample          | EGFR indel                                                                                    | internal                                                                 |
| Clinical sample 29 | FFPE Tumor Patient Sample          | EGFR indel                                                                                    | internal                                                                 |
| Clinical sample 30 | FFPE Tumor Patient Sample          | EGFR indel                                                                                    | internal                                                                 |
| Clinical sample 31 | FFPE Tumor Patient Sample          | EGFR indel                                                                                    | internal                                                                 |
| Clinical sample 32 | FFPE Tumor Patient Sample          | EGFR indel                                                                                    | internal                                                                 |
| Clinical sample 33 | FFPE Tumor Patient Sample          | EGFR indel                                                                                    | internal                                                                 |
| Clinical sample 34 | FFPE Tumor Patient Sample          | EGFR indel                                                                                    | internal                                                                 |
| Clinical sample 35 | FFPE Tumor Patient Sample          | ERBB2 indel                                                                                   | internal                                                                 |
| Clinical sample 36 | FFPE Tumor Patient Sample          | ATM indel                                                                                     | internal                                                                 |
| Clinical sample 37 | FFPE Tumor Patient Sample          | EGFR indel                                                                                    | internal                                                                 |
| Clinical sample 38 | FFPE Tumor Patient Sample          | KRAS indel                                                                                    | internal                                                                 |
| Clinical sample 39 | FFPE Tumor Patient Sample          | ROS1 rearrangement                                                                            | internal                                                                 |
| Clinical sample 40 | FFPE Tumor Patient Sample          | RET rearrangement                                                                             | internal                                                                 |
| Clinical sample 41 | FFPE Tumor Patient Sample          | ALK rearrangement                                                                             | internal                                                                 |
| Clinical sample 42 | FFPE Tumor Patient Sample          | ALK rearrangement                                                                             | internal                                                                 |





**Supplemental Table 15.**

| FFPE Sample | Mean Coverage Depth | Uniformity of Coverage (Pct>0.2*mean) | PCR duplication | Sequence mapped to ROI | Target Coverage at 100X | Target Coverage at 500X |
|-------------|---------------------|---------------------------------------|-----------------|------------------------|-------------------------|-------------------------|
| 1           | 648x                | 98.29%                                | 5%              | 83%                    | 98.86%                  | 95.90%                  |
| 2           | 693x                | 98.25%                                | 6%              | 84%                    | 99.08%                  | 96.60%                  |
| 3           | 543x                | 98.63%                                | 2%              | 76%                    | 99.25%                  | 96.25%                  |
| 4           | 743x                | 98.30%                                | 7%              | 83%                    | 99.22%                  | 96.93%                  |
| 5           | 757x                | 98.34%                                | 6%              | 84%                    | 99.08%                  | 96.75%                  |
| 6           | 694x                | 98.37%                                | 6%              | 80%                    | 98.96%                  | 96.32%                  |
| 7           | 742x                | 98.27%                                | 7%              | 79%                    | 98.95%                  | 96.44%                  |
| 8           | 526x                | 98.38%                                | 5%              | 76%                    | 99.13%                  | 95.92%                  |
| 9           | 590x                | 98.26%                                | 4%              | 78%                    | 98.95%                  | 95.87%                  |
| 10          | 599x                | 98.48%                                | 7%              | 77%                    | 99.19%                  | 96.38%                  |
